# Supplementary material for: Ternary Pb1−xCdxS quantum dot-based UV-vis-NIR photoelectrochemical photodetection with superior photoresponsivity and detectivity
Source: Royal Society of Chemistry journal article supplement (doi:10.1039/d4qi01176g), 2024-01-01
Supplement: d4qi01176g1.pdf [file d4qi01176g1.pdf]

## Supporting Information

### **Ternary $\text{Pb}_{1-x}\text{Cd}_x\text{S}$ Quantum Dot-Based UV-vis-NIR Photoelectrochemical Photodetection with Superior Photoresponsivity and Detectivity**

Youhua Zhu,<sup>‡a</sup> Zihui Huang,<sup>‡ab</sup> Songrui Wei,<sup>‡c</sup> Yi Hu,<sup>b</sup> Hongyan Chen,<sup>b</sup> Mengke Wang,<sup>b</sup> You Zi<sup>\*b</sup> and Weichun Huang<sup>\*b</sup>

<sup>a</sup>School of Microelectronics and School of Integrated Circuits, Nantong University, Nantong 226019, P. R. China

<sup>b</sup>School of Chemistry and Chemical Engineering, Nantong University, Nantong 226019, Jiangsu, P. R. China

<sup>c</sup>Key Laboratory of Optoelectronic Devices and Systems of Ministry of Education and Guangdong Province, College of Physics and Optoelectronic Engineering, Shenzhen University, Shenzhen 518060, P. R. China

<sup>‡</sup>These authors contributed equally to this work.

**Table S1** The elemental contents of  $\text{Pb}_{1-x}\text{Cd}_x\text{S}$  QDs with different  $x$  obtained from the EDS elemental mapping.

| Samples                                        | Pb (mol%) | Cd (mol%) | S (mol%) |
|------------------------------------------------|-----------|-----------|----------|
| PbS QDs                                        | 48.3      | 0         | 51.7     |
| $\text{Pb}_{0.25}\text{Cd}_{0.75}\text{S}$ QDs | 9.8       | 44.4      | 45.8     |
| $\text{Pb}_{0.50}\text{Cd}_{0.50}\text{S}$ QDs | 27.1      | 24.7      | 48.2     |
| $\text{Pb}_{0.75}\text{Cd}_{0.25}\text{S}$ QDs | 34.3      | 11.5      | 54.2     |
| CdS QDs                                        | 0         | 47.7      | 52.3     |

**Table S2** Laser power density ( $P_\lambda$ ) of incident light with various irradiation wavelengths.

| Laser                | $P_\lambda$ (mW cm <sup>-2</sup> ) |          |           |          |
|----------------------|------------------------------------|----------|-----------|----------|
|                      | Level I                            | Level II | Level III | Level IV |
| Simulated light (SL) | 21.8                               | 47.7     | 171       | 272      |
| 380 nm               | 0.15                               | 0.30     | 0.85      | 1.50     |
| 420 nm               | 0.40                               | 0.60     | 1.90      | 3.10     |
| 450 nm               | 2.95                               | 6.65     | 21.7      | 38.0     |
| 475 nm               | 2.87                               | 5.95     | 22.4      | 39.3     |
| 520 nm               | 3.20                               | 7.15     | 23.2      | 40.2     |
| 600 nm               | 3.05                               | 6.30     | 20.2      | 35.1     |
| 700 nm               | 4.72                               | 10.3     | 33.1      | 57.4     |
| 808 nm               | 2.42                               | 5.15     | 16.5      | 28.4     |
| 940 nm               | 1.23                               | 2.25     | 3.61      | 4.58     |

**Table S3** Photocurrent density (unit:  $\mu\text{A cm}^{-2}$ ) of the as-fabricated  $\text{Pb}_{0.50}\text{Cd}_{0.50}\text{S}$  QDs under SL and lasers with different wavenumbers at 0.4 V in 0.1 M KOH.

| $\text{Pb}_2\text{Cd}_2\text{S}$ QDs | Level I | Level II | Level III | Level IV     |
|--------------------------------------|---------|----------|-----------|--------------|
| SL                                   | 8.031   | 28.22    | 74.14     | <b>80.92</b> |
| 380 nm                               | 4.096   | 8.274    | 17.59     | 19.77        |
| 420 nm                               | 2.232   | 4.056    | 10.55     | 15.73        |
| 450 nm                               | 1.776   | 3.413    | 8.770     | 14.23        |
| 475 nm                               | 0.957   | 1.730    | 4.234     | 7.270        |
| 520 nm                               | 0.598   | 1.057    | 2.412     | 3.823        |
| 600 nm                               | 0.301   | 0.542    | 1.263     | 1.915        |
| 700 nm                               | 0.052   | 0.108    | 0.272     | 0.416        |
| 808 nm                               | 0.014   | 0.023    | 0.051     | 0.092        |
| 940 nm                               | 0.012   | 0.015    | 0.019     | 0.036        |

**Table S4** Photoresponsivity (unit:  $\mu\text{A W}^{-1}$ ) of the as-fabricated  $\text{Pb}_{0.50}\text{Cd}_{0.50}\text{S}$  QDs under SL and lasers with different wavenumbers at 0.4 V in 0.1 M KOH.

|        | Level I | Level II            | Level III | Level IV |
|--------|---------|---------------------|-----------|----------|
| SL     | 368.4   | 591.2               | 433.3     | 297.4    |
| 380 nm | 27310   | <b><u>27580</u></b> | 20690     | 13180    |
| 420 nm | 5580    | 6760                | 5550      | 5070     |
| 450 nm | 602.0   | 513.2               | 404.1     | 374.5    |
| 475 nm | 333.4   | 290.8               | 189.0     | 185.0    |
| 520 nm | 186.9   | 147.8               | 104.0     | 95.10    |
| 600 nm | 96.69   | 86.03               | 62.52     | 54.56    |
| 700 nm | 11.02   | 10.49               | 8.218     | 7.247    |
| 808 nm | 5.785   | 4.466               | 3.091     | 3.239    |
| 940 nm | 9.756   | 6.667               | 5.263     | 7.860    |

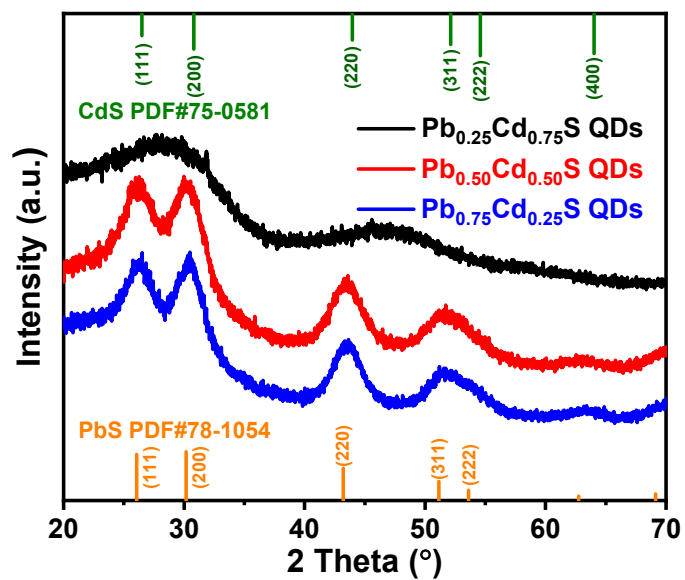

**Fig. S1.** XRD patterns of the  $\text{Pb}_{1-x}\text{Cd}_x\text{S}$  QDs with different  $x$ .

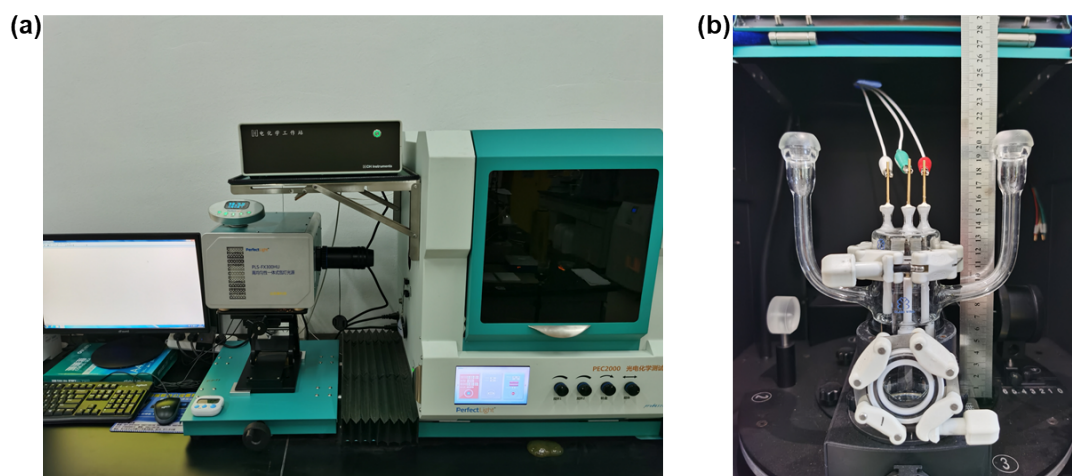

**Fig. S2.** Photographs of the (a) PEC measurement system and (b) standard three electrodes in the PEC system.

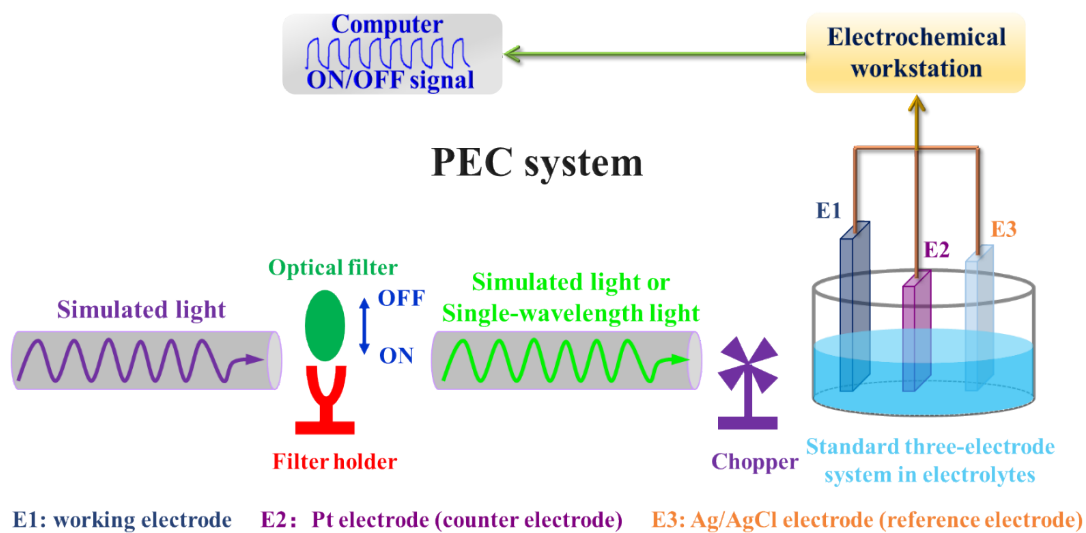

**Fig. S3.** The schematic illustration of the PEC measurement system.

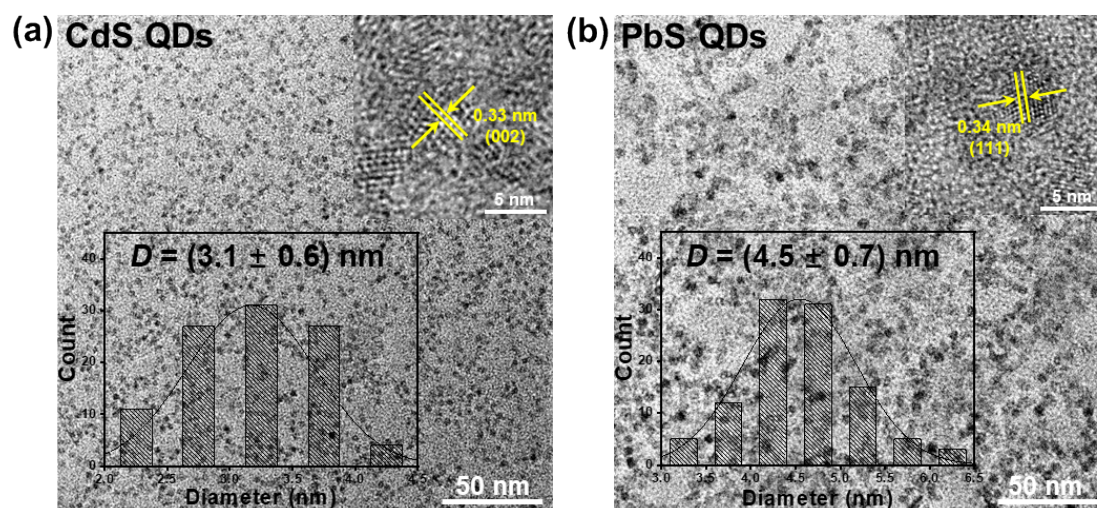

**Fig. S4.** TEM images of the (a) CdS QDs and (b) PbS QDs.

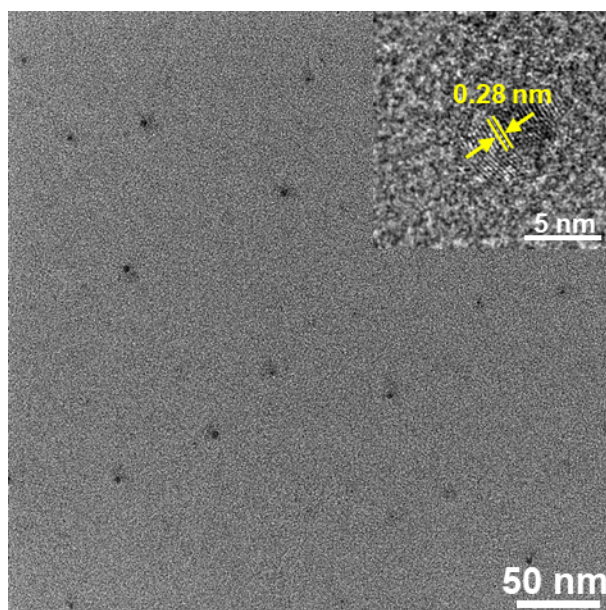

**Fig. S5.** TEM image of the  $\text{Pb}_{0.50}\text{Cd}_{0.50}\text{O}$  bimetallic cluster; inset shows the HRTEM image.

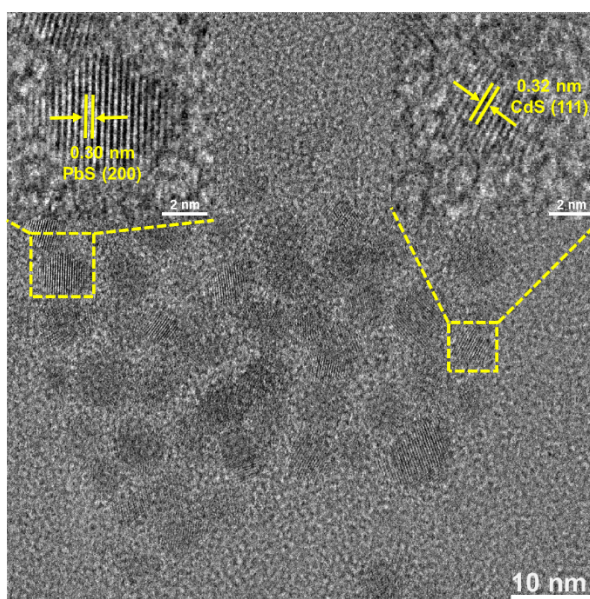

**Fig. S6.** TEM image of the  $\text{PbS}_{0.50}/\text{CdS}_{0.50}$  QDs; insets show the corresponding HRTEM images of PbS QDs (upper left) and CdS QDs (upper right), respectively.

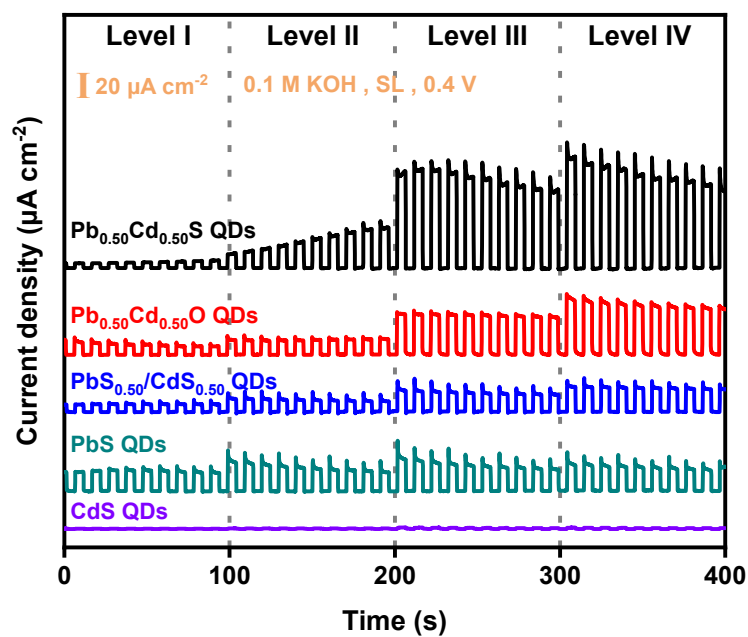

**Fig. S7.** The photoresponse behavior for different PEC electrodes in 0.1 M KOH at 0.4 V.

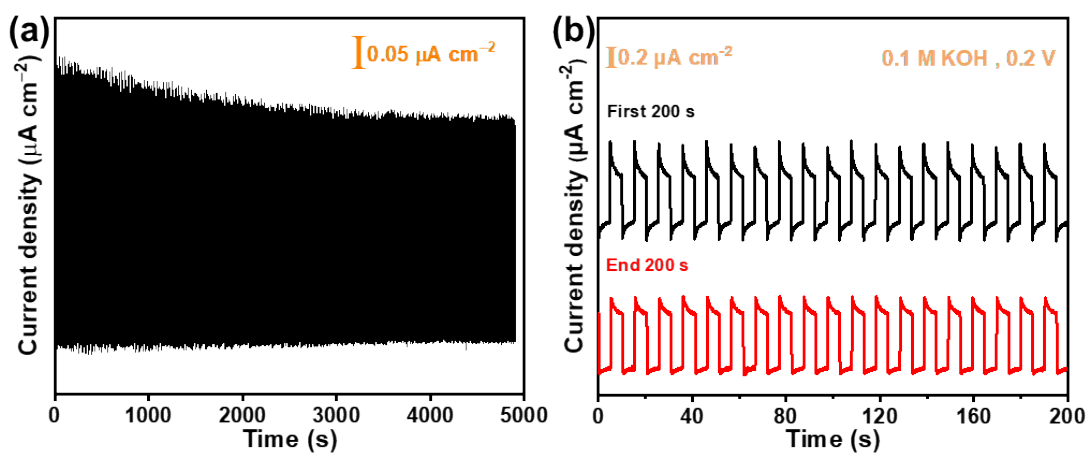

**Fig. S8.** (a) Photoresponse stability of the  $\text{Pb}_{0.50}\text{Cd}_{0.50}\text{S}$  QD-based PEC electrode; and (b) enlarged areas for the first 200 s and end 200 s.



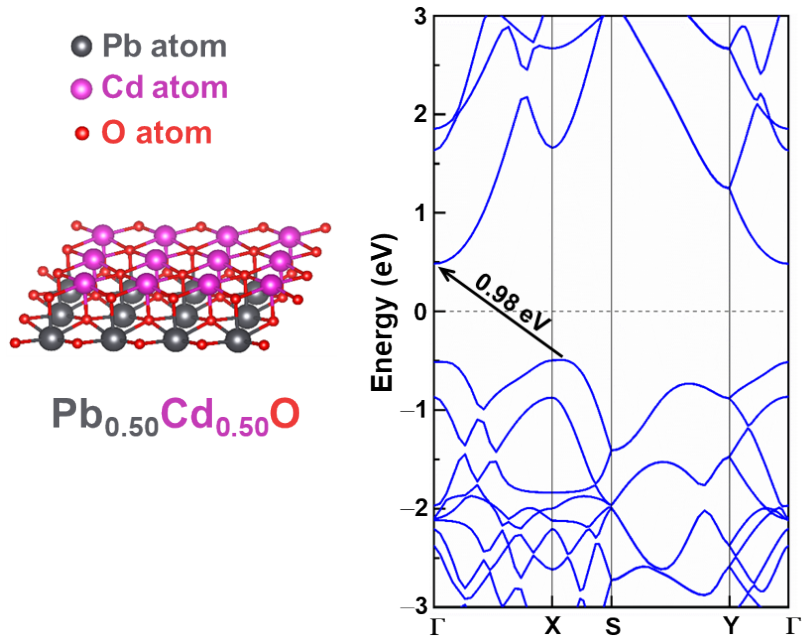

**Fig. S9.** Crystal structures of  $\text{Pb}_{0.50}\text{Cd}_{0.50}\text{O}$  and its electronic band structure.
